# Supplementary material for: Cost-effectiveness of the 2014 U.S. Preventive Services Task Force (USPSTF) Recommendations for Intensive Behavioral Counseling Interventions for Adults With Cardiovascular Risk Factors
Source: Oxford University Press journal article supplement (doi:10.2337/dc16-1186), 2017-02-17
Supplement: dc161186supplementarydata.pdf [file dc161186supplementarydata.pdf]

SUPPLEMENTARY DATA

**Supplementary Table 1. Population characteristics and size**

| Subgroups                |                 |                 |                 | Average value of Biomarkers |               |                             |               |               |                         |             |             | Percent in the USPSTF Population <sup>‡</sup> | Population (Million) |
|--------------------------|-----------------|-----------------|-----------------|-----------------------------|---------------|-----------------------------|---------------|---------------|-------------------------|-------------|-------------|-----------------------------------------------|----------------------|
| BMI (kg/m <sup>2</sup> ) | IFG             | Dyslipidemia    | Hypertension    | BMI (kg/m <sup>2</sup> )    | FPG (mg / DL) | Total cholesterol (mg / DL) | HDL (mg / DL) | LDL (mg / DL) | Triglycerides (mg / DL) | SBP (mm Hg) | DBP (mm Hg) |                                               |                      |
| 25-30                    | No <sup>†</sup> | No <sup>†</sup> | No <sup>†</sup> | 26.30                       | 95.26         | 183.00                      | 46.00         | 123.00        | 70.00                   | 130.00      | 76.67       | 0.07                                          | 0.07                 |
| 25-30                    | No              | No              | Yes             | 27.31                       | 89.68         | 169.07                      | 56.93         | 94.23         | 89.26                   | 130.84      | 74.46       | 1.63                                          | 1.60                 |
| 25-30                    | No              | Yes             | No              | 27.38                       | 91.00         | 213.03                      | 53.55         | 132.36        | 135.46                  | 114.58      | 69.04       | 22.73                                         | 22.28                |
| 25-30                    | No              | Yes             | Yes             | 27.42                       | 92.30         | 221.65                      | 56.03         | 136.24        | 147.29                  | 131.98      | 74.80       | 7.33                                          | 7.19                 |
| 25-30                    | Yes             | No              | No              | 27.15                       | 104.59        | 166.68                      | 53.81         | 96.42         | 82.14                   | 114.31      | 66.64       | 2.71                                          | 2.65                 |
| 25-30                    | Yes             | No              | Yes             | 27.72                       | 107.56        | 174.36                      | 61.77         | 94.59         | 89.92                   | 129.64      | 75.23       | 0.99                                          | 0.97                 |
| 25-30                    | Yes             | Yes             | No              | 27.60                       | 105.85        | 213.76                      | 51.00         | 134.21        | 146.22                  | 118.43      | 70.88       | 10.00                                         | 9.80                 |
| 25-30                    | Yes             | Yes             | Yes             | 27.60                       | 107.54        | 206.91                      | 54.39         | 123.98        | 142.59                  | 135.89      | 74.39       | 5.94                                          | 5.82                 |
| >30                      | No <sup>†</sup> | No <sup>†</sup> | No <sup>†</sup> | 43.09                       | 91.36         | 173.78                      | 44.73         | 113.96        | 76.49                   | 133.66      | 77.73       | 0.16                                          | 0.15                 |
| >30                      | No              | No              | Yes             | 36.79                       | 91.86         | 166.27                      | 53.16         | 95.54         | 88.02                   | 128.35      | 74.30       | 2.17                                          | 2.12                 |
| >30                      | No              | Yes             | No              | 34.20                       | 92.06         | 210.50                      | 48.57         | 131.41        | 152.52                  | 116.30      | 69.94       | 16.20                                         | 15.87                |
| >30                      | No              | Yes             | Yes             | 36.08                       | 92.76         | 202.79                      | 49.67         | 122.16        | 154.69                  | 128.90      | 75.31       | 7.40                                          | 7.25                 |
| >30                      | Yes             | No              | No              | 36.79                       | 105.99        | 165.50                      | 49.88         | 96.98         | 93.38                   | 117.80      | 70.84       | 2.47                                          | 2.42                 |
| >30                      | Yes             | No              | Yes             | 37.57                       | 109.87        | 172.90                      | 51.38         | 102.66        | 94.19                   | 131.18      | 70.99       | 1.71                                          | 1.68                 |
| >30                      | Yes             | Yes             | No              | 35.36                       | 106.52        | 207.17                      | 45.73         | 129.98        | 157.36                  | 119.74      | 71.56       | 8.98                                          | 8.80                 |
| >30                      | Yes             | Yes             | Yes             | 36.34                       | 108.77        | 208.88                      | 49.39         | 127.42        | 160.42                  | 131.22      | 75.17       | 9.52                                          | 9.33                 |

<sup>†</sup> The group absent all three major risk factors, IFG, dyslipidemia, and hypertension, is the subgroup with only metabolic syndrome but none of the other three. Persons with metabolic syndrome usually have at least one of the three major risk factors. Rarely, women who have abdominal obesity and specific blood pressure level (SBP 130 to 140 mm Hg or DBP 85 to 90 mm Hg) with HDL from 40 to 50 mg/dL falls in this category which accounted for 0.23% (0.07% overweight and 0.16% Obese) of the total eligible population

<sup>‡</sup>The total population here is the US adult population eligible for the USPSTF recommendation of 98 million.

SUPPLEMENTARY DATA

**Supplementary Table 2. Sensitivity analysis**

|                                     |                                | Incremental outcomes from no intervention |       |                             |                   |
|-------------------------------------|--------------------------------|-------------------------------------------|-------|-----------------------------|-------------------|
|                                     |                                | Remaining Life<br>Years                   | QALY  | Total<br>Costs <sup>†</sup> | ICER<br>(\$/QALY) |
| Base case*                          |                                | 0.019                                     | 0.019 | \$262                       | \$13,900          |
| <b>One-way sensitivity analysis</b> |                                |                                           |       |                             |                   |
| Simulation horizon of 10 years      |                                | 0.004                                     | 0.010 | \$426                       | \$42,300          |
| Simulation horizon of lifetime      |                                | 0.038                                     | 0.025 | \$233                       | \$9,400           |
| Discount rate of 0%                 |                                | 0.019                                     | 0.026 | \$133                       | \$5,200           |
| Discount rate of 5%                 |                                | 0.019                                     | 0.016 | \$321                       | \$20,200          |
| <b>Two-way sensitivity analysis</b> |                                |                                           |       |                             |                   |
| <b>Effectiveness</b>                | <b>Intervention Cost</b>       |                                           |       |                             |                   |
| Low                                 | Group-only interventions       | 0.014                                     | 0.016 | \$120                       | \$7,700           |
| Low                                 | Base case                      | 0.014                                     | 0.016 | \$354                       | \$22,800          |
| Low                                 | Base case + one-time screening | 0.014                                     | 0.016 | \$409                       | \$26,300          |
| Base                                | Group-only interventions       | 0.019                                     | 0.019 | \$28                        | \$1,500           |
| Base                                | Base case + one-time screening | 0.019                                     | 0.019 | \$317                       | \$16,800          |
| High                                | Group-only interventions       | 0.023                                     | 0.022 | -\$64                       | Cost saving       |
| High                                | Base case                      | 0.023                                     | 0.022 | \$169                       | \$7,600           |
| High                                | Base case + one-time screening | 0.023                                     | 0.022 | \$225                       | \$10,100          |

**Assuming extended effectiveness after intervention**

SUPPLEMENTARY DATA

|                          | Remaining Life<br>Years | QALY  | Total<br>Costs <sup>†</sup> | ICER<br>(\$/QALY) |
|--------------------------|-------------------------|-------|-----------------------------|-------------------|
| Scenario 1**             | 0.034                   | 0.031 | -\$90                       | -\$2,870          |
| Scenario 2 <sup>††</sup> | 0.034                   | 0.031 | \$365                       | \$11,627          |

\*Base case - intervention with a mixture of group and individual sessions, no screening, and moderate intervention effectiveness.

<sup>†</sup>The total costs include the intervention and costs associated with treating future CVD, type 2 diabetes, and diabetes-related complications.

\*\* With no additional cost, DM reduction to be 54% in the first year (year of intervention), and after the intervention, to be 30% in the 2nd year and 10% for year 3-5, and 0% after year 5.

<sup>††</sup> with additional costs (\$200 for 2nd year and \$100 year 3-5), and the same effectiveness as Scenario 1

SUPPLEMENTARY DATA

**Supplementary Table 3. Cumulative cases of diabetes, myocardial infarction/cardiac arrest, stroke, and death prevented by implementing the USPSTF-recommended lifestyle counseling program among persons at high risk of cardiovascular disease, by year**

| Year | Diabetes  | MI/Cardiac Arrest | Stroke | Death   |
|------|-----------|-------------------|--------|---------|
| 1    | 0         | 0                 | 0      | 0       |
| 2    | 1,381,051 | 15,124            | 5,890  | 5,646   |
| 3    | 1,323,850 | 15,628            | 6,130  | 15,728  |
| 4    | 1,269,802 | 15,981            | 6,299  | 25,353  |
| 5    | 1,218,757 | 16,197            | 6,401  | 34,218  |
| 6    | 1,170,609 | 16,289            | 6,442  | 41,739  |
| 7    | 1,125,337 | 16,313            | 6,397  | 51,831  |
| 8    | 1,082,799 | 16,187            | 6,270  | 60,511  |
| 9    | 1,042,844 | 16,080            | 6,185  | 67,884  |
| 10   | 1,005,323 | 15,859            | 6,031  | 73,992  |
| 11   | 970,091   | 15,544            | 5,817  | 78,963  |
| 12   | 937,107   | 15,147            | 5,552  | 84,527  |
| 13   | 906,221   | 14,674            | 5,236  | 88,939  |
| 14   | 877,293   | 14,139            | 4,878  | 92,629  |
| 15   | 850,191   | 13,548            | 4,483  | 95,665  |
| 16   | 825,078   | 12,910            | 4,059  | 91,224  |
| 17   | 801,673   | 12,377            | 3,739  | 95,033  |
| 18   | 779,872   | 11,780            | 3,379  | 97,967  |
| 19   | 759,572   | 11,131            | 2,984  | 100,110 |
| 20   | 740,672   | 10,437            | 2,559  | 101,560 |
| 21   | 723,072   | 9,708             | 2,108  | 102,419 |
| 22   | 706,753   | 8,949             | 1,634  | 103,569 |
| 23   | 691,613   | 8,160             | 1,137  | 104,043 |
| 24   | 677,562   | 7,349             | 622    | 103,983 |
| 25   | 664,515   | 6,518             | 92     | 103,503 |

\*The estimates are based on the total eligible population of 98 million in the United States.
